# Supplementary material for: From window panes to bone regeneration: structure, viscosity and bioactivity of soda lime silicate glasses
Source: Royal Society of Chemistry journal article supplement (doi:10.1039/d4tb02414a), 2025-01-01
Supplement: d4tb02414a1.pdf [file d4tb02414a1.pdf]

## From window panes to bone regeneration: Structural, viscosity and bioactivity of soda lime silicate glasses

Zhaorui Jin,<sup>a</sup> Daniel R. Neuville,<sup>\*b</sup> Coraline Chartier,<sup>a</sup> Pavel Kachanov,<sup>a</sup> Scott Kroeker,<sup>c</sup> Stéphane Gin,<sup>d</sup>  
Jincheng Du,<sup>\*e</sup> Delia S. Brauer<sup>\*a</sup>

### Supplementary Information

<sup>a</sup> Otto Schott Institute of Materials Research, Friedrich Schiller University, Lessingstr. 12 (AWZ), 07743 Jena, Germany

<sup>b</sup> Geomat Lab, Institut de Physique du Globe de Paris, CNRS-UPC, 1 rue Jussieu, 75005 Paris, France

<sup>c</sup> Department of Chemistry, University of Manitoba, Winnipeg, Manitoba R3T 2N2, Canada

<sup>d</sup> Commissariat à l'énergie atomique et aux énergies alternatives, DES, ISEC, DPME, SEME, University of Montpellier, Marcoule, F-30207 Bagnols-sur-Cèze, France

<sup>e</sup> Department of Materials Science and Engineering, University of North Texas, Denton, TX 76207, USA

\*Corresponding authors: Delia S. Brauer: [delia.brauer@uni-jena.de](mailto:delia.brauer@uni-jena.de), Daniel R. Neuville: [neuville@ipgp.fr](mailto:neuville@ipgp.fr), Jincheng Du: [jincheng.du@unt.edu](mailto:jincheng.du@unt.edu).

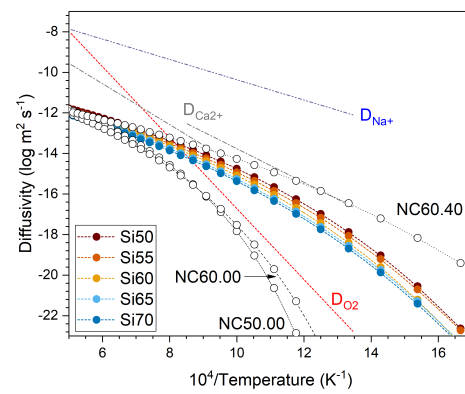

**Figure S1:** Diffusivity calculated from the viscosity data of the glasses in this study together with that of glasses of the nominal molar composition 50 SiO<sub>2</sub>-50 CaO (NC50.00), 60 SiO<sub>2</sub>-40 CaO (NC60.00) and 60 SiO<sub>2</sub>-40 Na<sub>2</sub>O (NC60.40).<sup>1</sup> Results are compared with literature values for diffusivity of sodium ions in glass of albite or orthoclase composition,<sup>2</sup> diffusivity of calcium ions in glass of albite or jadeite composition<sup>3</sup> and diffusivity of oxygen in diopside glass.<sup>4</sup>

**Table S1:** Parameters obtained from the fitting of the low-temperature viscosity data by the Vogel-Fulcher-Tammann equation.

| Glass | A<br>J/mol | B<br>J/mol K | T <sub>1</sub><br>K |
|-------|------------|--------------|---------------------|
| Si70  | -10.934    | 10870        | 364.96              |
| Si65  | -9.1157    | 8617.2       | 422.76              |
| Si60  | -3.9871    | 4180.3       | 554.39              |
| Si55  | 0.94997    | 1776.2       | 639.31              |
| Si50  | 0.84529    | 1672.5       | 638.31              |

**Table S2:** Parameters obtained from the fitting of viscosity data by the Adam-Gibbs equation: temperature of viscosity  $10^{12}$  Pa s ( $T_g(\eta)$ ), heat capacity of the glass at the onset of  $T_g$  ( $C_p^g(T_g)$ ), heat capacity of the liquid ( $C_p^l$ ), configurational heat capacity ( $C_p^{conf}$ )

| Glass | T <sub>g</sub> ( $\eta$ )<br>°C (K) | C <sub>p</sub> <sup>g</sup> (T <sub>g</sub> )<br>J/mol K | C <sub>p</sub> <sup>l</sup><br>J/mol K | C <sub>p</sub> <sup>conf</sup> (T <sub>g</sub> )<br>J/mol K | A <sub>e</sub><br>J/mol | B <sub>e</sub><br>J/mol K | S <sup>conf</sup> (T <sub>g</sub> )<br>J/mol |
|-------|-------------------------------------|----------------------------------------------------------|----------------------------------------|-------------------------------------------------------------|-------------------------|---------------------------|----------------------------------------------|
| Si70  | 566<br>(838.9)                      | 69.86                                                    | 85.89                                  | 16.03                                                       | -2.31                   | 98661                     | 8.22                                         |
| Si65  | 558<br>(830.9)                      | 69.97                                                    | 86.64                                  | 16.67                                                       | -2.45                   | 97766                     | 8.17                                         |
| Si60  | 543<br>(815.9)                      | 69.94                                                    | 87.39                                  | 17.45                                                       | -2.21                   | 80559                     | 6.93                                         |
| Si55  | 527<br>(800.1)                      | 69.87                                                    | 88.14                                  | 18.27                                                       | -2.27                   | 79577                     | 6.96                                         |
| Si50  | 515<br>(788.2)                      | 69.89                                                    | 88.90                                  | 19.01                                                       | -2.43                   | 77925                     | 6.84                                         |

## References

1. D. R. Neuville, *Chem Geol*, 2006, **229**, 28-41.
2. A. Jambon and J. P. Carron, *Geochim Cosmochim Ac*, 1976, **40**, 897-903.
3. K. Roselieb and A. Jambon, *Geochim Cosmochim Ac*, 2002, **66**, 109-123.
4. K. W. Semkow and L. A. Haskin, *Geochim Cosmochim Ac*, 1985, **49**, 1897-1908.
